# Supplementary material for: Synergistic effects of transcutaneous vagus nerve stimulation and inhibitory control training on electrophysiological performance in healthy adults
Source: Front Neurosci. 2023 Mar 9;17:1123860. doi: 10.3389/fnins.2023.1123860 (PMC10033592; doi:10.3389/fnins.2023.1123860)
Supplement: Supplementary Table 1 — The original data of Figure 3A. [file Table_1.xlsx]

## Sheet: Sheet1
Signal-N2 Amplitude in Frontal Region.
Subject_ID	Group	Pre-test	Post-test
15	1	-5.2187	-3.1392
16	1	-4.9312	-5.4683
24	1	-6.1964	-7.471
26	1	-1.3311	-1.5968
30	1	-3.1922	-2.8976
51	1	-10.7323	-5.7056
54	1	-7.5584	-4.0716
56	1	3.1829	-4.4205
57	1	-3.5469	-1.6667
58	1	-5.7882	-4.2236
5	1	-1.179	-2.4808
64	1	1.433	-5.4668
6	1	-6.3374	-5.2774
76	1	0.0392	-0.5114
11	2	-3.0192	-5.2941
17	2	-0.2616	-2.0251
19	2	-2.0786	-7.7752
22	2	-3.8995	-7.3739
28	2	-3.4616	-3.2617
36	2	2.6267	-3.9896
3	2	-1.4811	-8.8021
41	2	-9.398	-5.7838
49	2	-5.5013	-2.6726
52	2	-4.871	-4.9985
61	2	0.7926	0.3095
68	2	-7.0902	0.2353
69	2	-5.2055	-2.793
72	2	-1.2689	-3.3134
77	2	-3.4254	-2.8862
10	3	2.2865	-4.0438
12	3	-2.2198	-4.9577
14	3	-0.0063	-0.615
27	3	-5.6477	-7.3528
2	3	-0.4306	-2.9027
42	3	-1.4625	-3.5288
45	3	-1.132	-2.3352
4	3	-2.9698	-10.8927
60	3	-5.2395	-6.4438
63	3	-9.2663	-10.3117
70	3	-6.3162	-6.6864
75	3	-3.1915	-6.0301
78	3	-7.2313	-4.526
79	3	-4.8887	-5.632
80	3	-2.5305	-2.7328
20	4	-12.5559	-11.9487
21	4	-1.9243	-3.2809
33	4	-2.2926	-5.4731
34	4	-9.822	-7.1689
35	4	-6.7475	-1.7363
37	4	1.7538	-0.53
38	4	-5.7019	-4.7655
44	4	-3.148	-3.7615
48	4	-5.2767	-6.696
50	4	-2.775	-3.2247
53	4	-5.3821	-10.3703
71	4	-6.1243	-6.7561
73	4	-6.7161	-7.6071
9	4	-3.6961	-2.9865
